# Supplementary material for: The BMP Antagonist Follistatin-Like 1 Is Required for Skeletal and Lung Organogenesis
Source: PubMed Central journal article supplement (PMC3149603; doi:10.1371/journal.pone.0022616), 2011-08-03

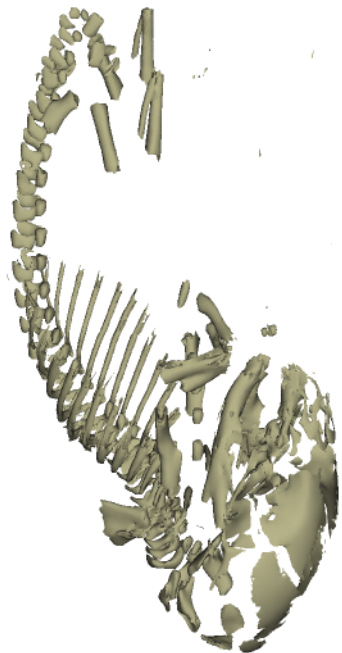

Supplement: pone.0022616.s001.pdf [file pone.0022616.s001.pdf]
